# Supplementary material for: Differences in Recycling of Apolipoprotein E3 and E4—LDL Receptor Complexes—A Mechanistic Hypothesis
Source: MDPI journal article supplement (doi:10.3390/ijms22095030), 2021-05-10
Supplement: s1 [file s1]

## Supplementary Materials

# A

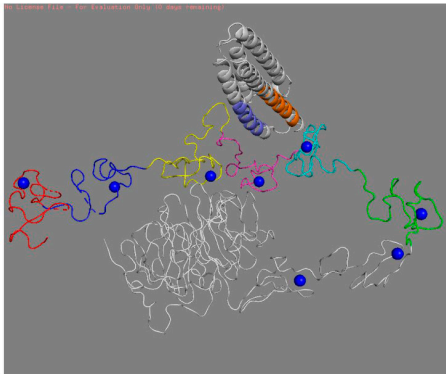

# B

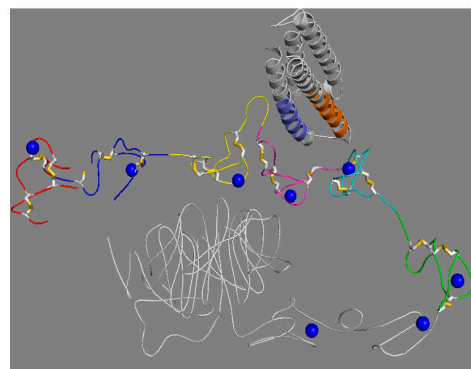

**Figure S1.** Structures of ligand domain (LD) of ApoE and LDL-A repeats of LDLR.
